# Supplementary material
Source: publisher figshare collection journal article supplement (https://brill.figshare.com/articles/dataset/_/20455677)
Supplement: Supplementary file 1 [file 1]

**Phylogeny of the Neotropical wood degrading beetles  
(Scarabaeoidea: Passalidae) of the tribe Passalini, inferred from  
molecular and morphological data**

**Larry Jiménez-Ferbans<sup>a,\*</sup>, Cristian Beza-Beza<sup>b</sup>, Christopher J. Marshall<sup>c</sup> and Pedro  
Reyes-Castillo<sup>d</sup>**

<sup>a</sup>Facultad de Ciencias Básicas. Universidad del Magdalena, Santa Marta 470004, Colombia

<sup>b</sup>Department of Entomology and Plant Pathology, North Carolina State University, Raleigh, NC 27695, USA

<sup>c</sup>Department of Integrative Biology, Oregon State Arthropod Collection. Oregon State University, Corvallis,  
OR 97331, USA

<sup>d</sup>Instituto de Ecología, A.C., Carretera antigua a Coatepec 351, El Haya, Xalapa 91070, Veracruz, México

\*Corresponding autor; e-mail: [ljimenezf@unimagdalena.edu.co](mailto:ljimenezf@unimagdalena.edu.co)

ORCID iDs: Jiménez-Ferbansa: 0000-0002-5710-2265; Beza-Beza: 0000-0003-3276-4876; Marshall: 0000-  
0001-8867-4867

**Supplementary material**

**File S1.** Morphological matrix.

**File S2.** Combined matrix with 16S molecular data and morphological data,
